# Supplementary material for: Highly-ordered maghemite/reduced graphene oxide nanocomposites for high-performance photoelectrochemical water splitting
Source: Royal Society of Chemistry journal article supplement (doi:10.1039/c5ra02934a), 2015-01-01
Supplement: c5ra02934a1.pdf [file c5ra02934a1.pdf]

# Highly-ordered Maghemite/Reduced Graphene Oxide Nanocomposites for High-performance Photoelectrochemical Water Splitting

Sundaram Chandrasekaran<sup>a</sup>, Seung Hyun Hur<sup>a\*</sup>, Eui Jung Kim<sup>a</sup>, Balasubramanian Rajagopalan<sup>a</sup>, Kadumudi Firoz Babu<sup>a</sup>, Velusamy Senthilkumar<sup>b</sup>, Jin Suk Chung<sup>a</sup>, Won Mook Choi<sup>a</sup> and Yong Soo Kim<sup>b</sup>

<sup>a</sup> School of Chemical Engineering, University of Ulsan, Daehak-ro, 102, Nam-gu, Ulsan 680-749, South Korea. Fax: +82 52 259 1689; Tel: +82 52 259 1028;

<sup>b</sup> Department of Physics and Energy Harvest-Storage Research Center, University of Ulsan, Ulsan 680-749, South Korea.

\*Corresponding Authors: [shhur@ulsan.ac.kr](mailto:shhur@ulsan.ac.kr) (Seung Hyun Hur)

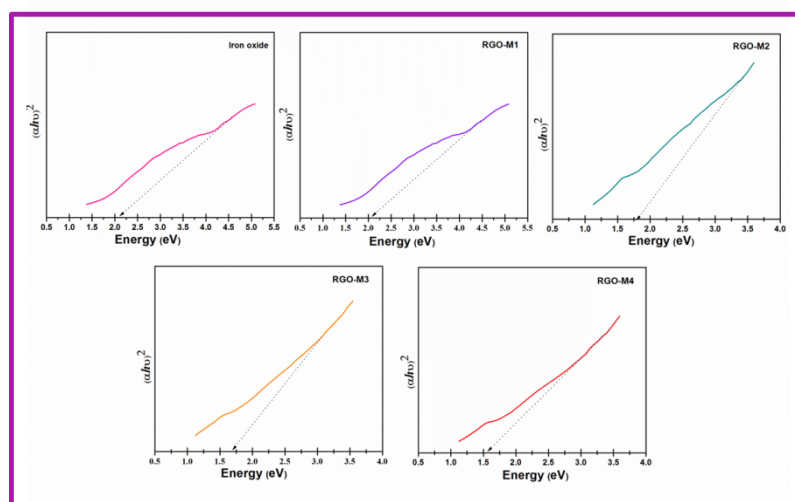

**Fig S1.** The Band gap calculation of Iron oxide and RGO/ $\gamma$ -Fe<sub>2</sub>O<sub>3</sub> samples

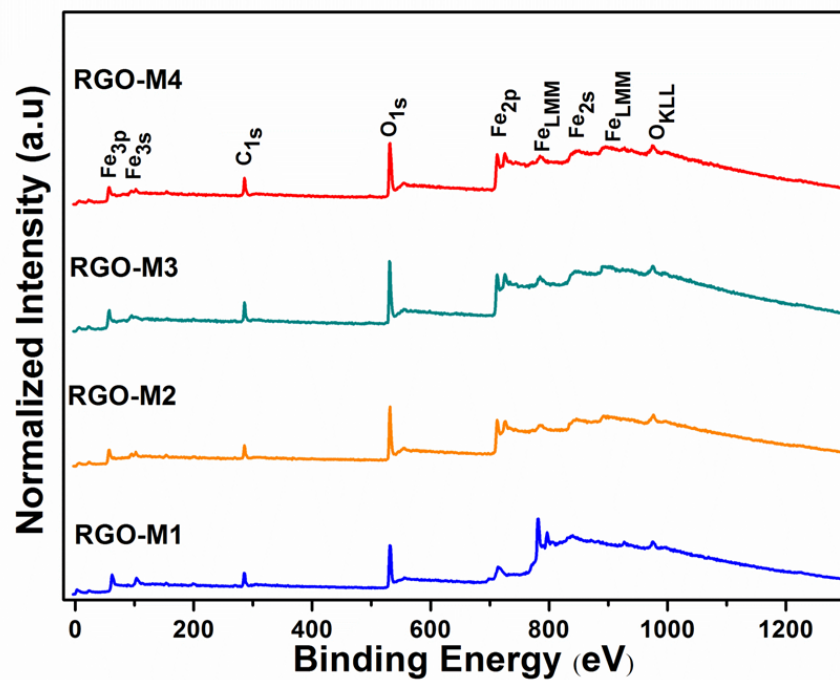

Fig S2. XPS spectra of RGO/ $\gamma$ -Fe<sub>2</sub>O<sub>3</sub> samples

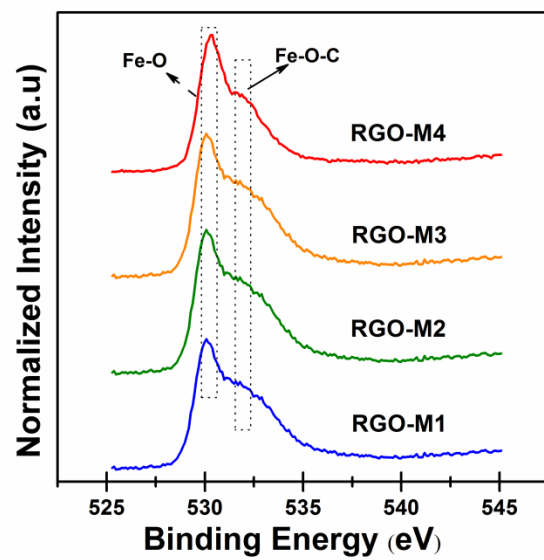

Fig S3. XPS - O1s core level spectra of RGO/ $\gamma$ -Fe<sub>2</sub>O<sub>3</sub> samples

**Table S1: Binding energy (B.E.) of Fe-O and Fe-O-C bonds in O 1s spectra**

| Samples       | Binding Energy (eV) values by present work |             | Reported B.E (eV) |             | Ref |
|---------------|--------------------------------------------|-------------|-------------------|-------------|-----|
|               | Fe-O bond                                  | Fe-O-C bond | Fe-O bond         | Fe-O-C bond |     |
| <b>RGO-M1</b> | 529.96                                     | 531.84      | 529.8             | 531.2       | 18  |
| <b>RGO-M2</b> | 530.07                                     | 531.96      | 530.3             | 531.7       | 48  |
| <b>RGO-M3</b> | 530.08                                     | 532.03      | 530.3             | 531.7       | 48  |
| <b>RGO-M4</b> | 530.31                                     | 532.15      | 530.3             | 531.7       | 48  |
